# Supplementary material for: Efficacy and safety of subcutaneous and intravenous rituximab plus cyclophosphamide, doxorubicin, vincristine, and prednisone in first-line diffuse large B-cell lymphoma: the randomized MabEase study
Source: PubMed Central journal article supplement — Haematologica. 2017 Sep 21;102(11):1913–22. doi: 10.3324/haematol.2017.173583 (PMC5664395; doi:10.3324/haematol.2017.173583), 2017-11
Supplement: 2017.173583.LUGTENBURG_SUPPL.pdf [file 2017.173583.LUGTENBURG_SUPPL.pdf]

## Efficacy and safety of subcutaneous and intravenous rituximab plus cyclophosphamide, doxorubicin, vincristine, and prednisone in first-line diffuse large B-cell lymphoma: the randomized MabEase study

Pieterella Lugtenburg,<sup>1</sup> Irit Avivi,<sup>2</sup> Henriette Berenschot,<sup>3</sup> Osman Ilhan,<sup>4</sup> Jean Pierre Marolleau,<sup>5</sup> Arnon Nagler,<sup>6</sup> Antonio Rueda,<sup>7</sup> Monica Tani,<sup>8</sup> Mehmet Turgut,<sup>9</sup> Stuart Osborne,<sup>10</sup> Rodney Smith<sup>11</sup> and Michael Pfreundschuh<sup>12</sup>

<sup>1</sup>Department of Hematology, Erasmus MC Cancer Institute, Rotterdam, the Netherlands; <sup>2</sup>The Sackler Faculty of Medicine, Tel Aviv University, Israel; <sup>3</sup>Department of Hematology, Alberts Schweitzer Hospital, Dordrecht, the Netherlands; <sup>4</sup>Department of Hematology, Ankara University School of Medicine, Turkey; <sup>5</sup>Unit of Hematology, University Hospital of Amiens, France; <sup>6</sup>Division of Hematology, Chaim Sheba Medical Center, Tel Hashomer, Israel; <sup>7</sup>Área de Oncología. Unidad de Oncología Médica, E.P. Hospital Costa del Sol, Marbella, Spain; <sup>8</sup>Hematology Unit, Santa Maria Delle Croci Hospital, Ravenna, Italy; <sup>9</sup>Hematology Department, Ondokuz Mayıs University, Samsun, Turkey; <sup>10</sup>PDMA Operations (Biometrics), F. Hoffmann-La Roche Ltd., Basel, Switzerland; <sup>11</sup>Pharma Development Oncology, F. Hoffmann-La Roche Ltd., Basel, Switzerland and <sup>12</sup>Department of Internal Medicine I, University Hospital of Saarland, Homburg, Germany

©2017 Ferrata Storti Foundation. This is an open-access paper. doi:10.3324/haematol.2017.173583

Received: June 2, 2017.

Accepted: September 14, 2017.

Pre-published: September 21, 2017.

Correspondence: p.lugtenburg@erasmusmc.nl

---

## Supplementary Appendix

### *Supplementary methods*

#### *Inclusion/exclusion criteria*

##### *Inclusion criteria*

1. Signed written informed consent form.
2. Age  $\geq 18$  and  $\leq 80$  years at time of study inclusion.
3. Histologically confirmed, previously untreated CD20-positive diffuse large B-cell lymphoma (DLBCL) according to the World Health Organization (WHO) classification system.
4. Patients with an International Prognostic Index (IPI) score of 1–5 or IPI score of 0 with bulky disease, defined as one lesion  $\geq 7.5$  cm.
5. At least one bi-dimensionally measurable lesion defined as  $\geq 1.5$  cm in its largest dimension on computed tomography (CT) scan, positron emission tomography-CT (PET-CT) scan or magnetic resonance imaging (MRI).
6. Adequate hematologic function, defined as follows:
  - a. Hemoglobin  $\geq 9$  g/dL (Note: no transfusions allowed within 2 weeks prior to the start of study drug administration).
  - b. Absolute neutrophil count (ANC)  $\geq 1.5 \times 10^9/L$ .
  - c. Platelet count  $\geq 75 \times 10^9/L$ .
  - d. Note: abnormalities outside the above listed are allowed if related to involvement of bone marrow by the underlying disease.
7. Eastern Cooperative Oncology Group (ECOG) performance status  $\leq 2$ .
8. Agreement to use adequate contraception during the study treatment period and for at least 12 months after the last dose of study drug:

- a. For women of childbearing potential: agreement to use two adequate methods of contraception, including at least one method with a failure rate of <1% per year (e.g., hormonal implants, combined oral contraceptives, vasectomized partner).  
Women of childbearing potential are defined as either pre-menopausal or women who are <2 years after the onset of menopause and are not surgically sterile.
- b. For men (unless vasectomized): agreement to use a barrier method of contraception.

**Exclusion criteria**

1. Primary or secondary central nervous system lymphoma, histologic evidence of transformation to Burkitt lymphoma, primary mediastinal DLBCL, primary effusion lymphoma, primary cutaneous DLCL, or primary DLBCL of the testis.
2. Transformed lymphoma or follicular lymphoma IIIB.
3. Prior therapy for DLBCL, with the exception of nodal biopsy or local irradiation.
4. History of other malignancy, except:
  - a. Patients with curatively treated basal or squamous cell carcinoma or melanoma of the skin or *in situ* carcinoma of the cervix are eligible;
  - b. A malignancy that has been treated but not with curative intent will be excluded, unless the malignancy has been in remission without treatment for  $\geq 5$  years prior to enrolment.
5. Inadequate renal function, defined as creatinine >1.5 times the upper limit of normal (ULN) (unless creatinine clearance [CrCl] normal), or calculated CrCl <30 mL/min (using the Cockcroft–Gault formula).
6. Inadequate hepatic function, defined as any of the following abnormal laboratory values:
  - a. Alanine aminotransferase (ALT) or aspartate aminotransferase (AST) >2.5 x the ULN
  - b. Alkaline phosphatase >2.5 x the ULN

- c. Total bilirubin  $\geq 1.5$  x the ULN (patients with documented Gilbert disease may be enrolled if total bilirubin is  $\leq 3.0$  x the ULN).
- 7. Known human immunodeficiency virus (HIV) infection or HIV seropositive status.
- 8. Active and/or severe bacterial, viral, fungal, mycobacterial, parasitic, or other infection (excluding fungal infections of nail beds) or any major episode of infection requiring treatment with intravenous (IV) antibiotics or hospitalization (related to the completion of the course of antibiotics except if for tumor fever) within 4 weeks prior to the start of the study drug administration.
- 9. Active hepatitis B virus (HBV) or active hepatitis C virus (HCV) infection (must be ruled out during screening). Patients with occult or prior HBV infection (defined as positive total hepatitis B core antibody [HBcAB] and negative or positive hepatitis B surface antigen [HBsAg] with undetectable HBV deoxyribonucleic acid [DNA]) may be included but these patients must be followed closely. Patients positive for HCV antibody are eligible only if polymerase chain reaction (PCR) testing for HCV ribonucleic acid (RNA) is negative.
- 10. Other serious underlying medical conditions, which, in the investigator's judgment, could impair the ability of the patient to participate in the study (e.g., significant cardiovascular disease, uncontrolled diabetes mellitus, gastric ulcers, active autoimmune disease).
- 11. Recent major surgery (within 4 weeks prior to the start of the study drug administration) other than for diagnostic purposes.
- 12. History of severe allergic or anaphylactic reactions to humanized or murine monoclonal antibodies or known sensitivity or allergy to murine products.
- 13. Contraindication to any of the individual components of cyclophosphamide, doxorubicin, vincristine, and prednisone (CHOP), including prior receipt of anthracyclines.
- 14. Prior treatment with cytotoxic drugs or rituximab for another condition (e.g., rheumatoid arthritis) or prior use of an anti-CD20 antibody.

15. Treatment with a monoclonal antibody within 3 months prior to the start of study drug administration.
16. Ongoing corticosteroid use at a dose of >30 mg/day of prednisone or equivalent. The dose of corticosteroid treatment ≤30 mg/day of prednisone or equivalent must be stable for at least 4 weeks prior to the start of study drug administration. A pre-phase of high-dose prednisolone (e.g. 100 mg/day for 3 to 5 days) is acceptable for patients with aggressive non-Hodgkin lymphoma (NHL).
17. Chemotherapy or other investigational therapy within 4 weeks prior to the start of study drug administration.
18. Inability to provide informed consent.
19. History of poor compliance during previous lines of therapy.
20. Life expectancy of less than 6 months.
21. Pregnancy or lactation. A negative serum pregnancy test is required for women of childbearing potential within 7 days prior to the start of study drug administration or within 14 days if with a confirmatory urine pregnancy test within 7 days prior to the start of study drug administration. Women of childbearing potential are defined as either pre-menopausal or women who are <2 years after the onset of menopause and are not surgically sterile.

### ***Details of ethical approval***

The study was conducted in line with International Conference on Harmonisation E6 guidelines for Good Clinical Practice and the Declaration of Helsinki. The study protocol was approved by independent ethics committees at each center.

### ***Study treatments***

Each 1,400 mg dose of rituximab subcutaneous (SC) was given as 11.7 mL of a 120 mg/mL solution by slow manual injection over 5 to 6 minutes. Rituximab IV was given by infusion through a

dedicated line at an initial rate of 50 mg/hour, which could be increased at 30-minute intervals to a maximum rate of 400 mg/hour. Commercially available standard CHOP chemotherapy was used.

### ***Assessments***

Tumor assessments were based on CT or MRI scans of the neck, chest, abdomen, and/or pelvis. Tumor response was assessed by the investigator according to International Working Group response criteria for NHL<sup>1</sup> after cycle 4 (interim staging) and at 30±3 days after day 1 of the last treatment cycle (final response evaluation). The 1999 response criteria were considered appropriate as not all centers had access to a PET scanner. Patients completed the validated Rituximab Administration Satisfaction Questionnaire (RASQ)<sup>2</sup> and Cancer Treatment Satisfaction Questionnaire (CTSQ)<sup>3</sup> at cycles 3 and 7.

Time savings were measured, including for rituximab administration time (time from start to end of rituximab SC injection/IV infusion), chair/bed time (time a patient occupied an infusion chair/bed for a single R-CHOP treatment cycle), and hospital time (time a patient was in hospital for one R-CHOP cycle).

Patients underwent an end-of-treatment safety assessment 30±3 days after day 1 of their last induction cycle. All adverse events (AEs) and serious adverse events (SAEs) were recorded and graded according to National Cancer Institute Common Terminology Criteria for Adverse Events version 4.0 (NCI CTCAE v 4.0). After study closure any deaths, SAEs, or AEs of special interest were recorded.

### ***Analysis populations***

The intent-to-treat population included all randomized patients who had completed a baseline assessment and at least one on treatment efficacy assessment. Safety analyses were conducted on the safety population included all patients who received at least one dose of study drug.

### ***Statistical analysis – primary efficacy analysis***

The primary efficacy analysis (investigator-assessed CR/CRu) was performed in the ITT population after all patients had completed induction. CR/CRu rates were analyzed by frequency tables including 95% 2-sided Clopper-Pearson confidence intervals (CIs). PFS was analyzed by the Kaplan–Meier method. At the time of the primary analysis, sub-analysis according to patient stratification factors, secondary outcomes, and RASQ and CTSQ outcomes were also evaluated.

Safety assessments included AEs, SAEs, grade  $\geq 3$  AEs, and ARRs according to NCI CTCAE 4.0, along with laboratory tests, and vital signs measurements.

### **References**

1. Cheson BD, Horning SJ, Coiffier B, et al. Report of an international workshop to standardize response criteria for non-Hodgkin's lymphomas. NCI Sponsored International Working Group. *J Clin Oncol.* 1999;17(4):1244.
2. Rule S, Briones J, Smith R, et al. Preference for Rituximab Subcutaneous (SC) and Intravenous (IV) Among Patients With CD20+ Non-Hodgkin's Lymphoma (NHL) Completing the RASQ Measure In Randomized Phase III Studies Prefmab and Mabcute. *Value Health.* 2014;17(7):A537.
3. Trask PC, Tellefsen C, Espindle D, Getter C, Hsu MA. Psychometric validation of the cancer therapy satisfaction questionnaire. *Value Health.* 2008;11(4):669-679.

## ***Supplementary results***

### ***Exploratory safety analysis***

Analysis of AEs in body surface area (BSA) subgroups showed an apparent higher incidence of grade  $\geq 3$  AEs and serious AEs (SAEs) in patients with low BSA ( $\leq 1.7 \text{ m}^2$ ) in the SC versus the IV arm, with a trend towards a higher incidence of grade  $\geq 3$  AEs and SAEs with decreasing BSA in the SC arm (Table S2). This increased incidence appeared to be driven by male patients. However, when analyzed further, there was no significant difference in the rates of grade  $\geq 3$  AEs or SAEs between treatment arms in male patients with low BSA and the observed difference was driven by the low sample size in the IV group. The imbalance in AEs between the SC and IV arms in the low BSA subgroup also appeared to be driven by neutropenia (grade  $\geq 3$  neutropenia was 30% in the SC arm versus 20% in the IV arm and febrile neutropenia was 16% in the SC arm versus 2% in the IV arm), as both a grade  $\geq 3$  AE and SAE. An exploratory analysis revealed that there was no significant interaction effect ( $P > 0.05$  for all comparisons) for AEs of grade  $\geq 3$  or SAEs with any of the covariates BSA, age group, or gender; therefore treatment effect on grade  $\geq 3$  AEs and SAEs (i.e., rituximab SC vs IV) is not modified by any of these parameters.

### ***Treatment satisfaction***

Overall, 428 patients were included in the RASQ analysis population with 423 (SC, 282; IV, 141) completing the RASQ at cycle 7. The mean RASQ scores were higher across all domains for rituximab SC versus IV (Table S3), with a mean satisfaction score of 90 (SC) versus 77 (IV; Figure 3, main text). More patients in the rituximab SC group versus the IV group thought that the length of time taken to get the SC injection/IV infusion was just right, (SC, 79%; IV, 58%). When patients in the SC group were asked, if given the option, which treatment they would prefer: 91% stated a preference to receive SC over IV.



A total of 421 patients were included in the CTSQ analysis population with 419 (SC, 278; IV, 141) completing the CTSQ at cycle 7. The mean satisfaction score was 86 (SC) versus 84 (IV; Figure 3, main text), and mean CTSQ scores for other domains were similar between the treatment arms (Table S4). RASQ and CTSQ results for cycle 3 were similar to those for cycle 7.

### ***Time savings***

From cycle 2 onwards, median administration time was 0.1 h (for each cycle) in the SC group, and ranged between 2.6 h (cycle 8) and 3 h (cycle 2) in the IV group. In cycle 2, 83% of patients in the SC arm had a chair/bed time  $\leq 4$  h, whereas 62% in the IV arm had a chair/bed time  $\geq 4$  h. For every cycle from cycle 2 onwards, a higher proportion of patients spent  $< 2$  h in a chair/bed receiving rituximab SC than IV (range: SC, 27%-56% vs IV,  $< 1\%$ -5%). In cycle 2, 65% of SC patients required  $\leq 6$  h of hospital time overall; whereas 52% receiving rituximab IV required  $\geq 6$  h.

**Table S1. Most common treatment-emergent AEs in cycle 2 or later in the safety population.**

| <b>Patients</b>                                                           | <b>Rituximab SC plus CHOP<br/>(n=369)</b> | <b>Rituximab IV plus CHOP<br/>(n=188)</b> | <b>P-Value by Fisher's<br/>Exact Test</b> |
|---------------------------------------------------------------------------|-------------------------------------------|-------------------------------------------|-------------------------------------------|
| <b>AEs of any grade in <math>\geq 10\%</math> of patients</b>             |                                           |                                           |                                           |
| Overall events                                                            | 337 (91.3)                                | 170 (90.4)                                | 0.7548                                    |
| Neutropenia                                                               | 96 (26.0)                                 | 45 (23.9)                                 | 0.6083                                    |
| Febrile neutropenia                                                       | 46 (12.5)                                 | 13 (6.9)                                  | 0.0575                                    |
| White blood cell count decreased                                          | 46 (12.5)                                 | 19 (10.1)                                 | 0.4859                                    |
| Anemia                                                                    | 79 (21.4)                                 | 37 (19.7)                                 | 0.6605                                    |
| Neutrophil count decreased                                                | 72 (19.5)                                 | 40 (21.3)                                 | 0.6552                                    |
| Fatigue                                                                   | 55 (14.9)                                 | 22 (11.7)                                 | 0.3636                                    |
| Nausea                                                                    | 51 (13.8)                                 | 30 (16.0)                                 | 0.5260                                    |
| Alopecia                                                                  | 49 (13.3)                                 | 23 (12.2)                                 | 0.7902                                    |
| Lymphocyte count decreased                                                | 48 (13.0)                                 | 17 (9.0)                                  | 0.2089                                    |
| Peripheral neuropathy                                                     | 42 (11.4)                                 | 18 (9.6)                                  | 0.5655                                    |
| Cough                                                                     | 37 (10.0)                                 | 13 (6.9)                                  | 0.2731                                    |
| Pyrexia                                                                   | 36 (9.8)                                  | 20 (10.6)                                 | 0.7666                                    |
| <b>Grade <math>\geq 3</math> AEs in <math>\geq 2\%</math> of patients</b> |                                           |                                           |                                           |
| Overall events                                                            | 215 (58.3)                                | 102 (54.3)                                | 0.3675                                    |
| Neutropenia                                                               | 80 (21.7)                                 | 34 (18.1)                                 | 0.3744                                    |
| Febrile neutropenia                                                       | 46 (12.5)                                 | 13 (6.9)                                  | 0.0575                                    |
| Anemia                                                                    | 16 (4.3)                                  | 7 (3.7)                                   | 0.8240                                    |
| Leukopenia                                                                | 7 (1.9)                                   | 5 (2.7)                                   | 0.5501                                    |
| Pneumonia                                                                 | 20 (5.4)                                  | 4 (2.1)                                   | 0.0795                                    |
| Neutrophil count decreased                                                | 47 (12.7)                                 | 25 (13.3)                                 | 0.8940                                    |
| White blood cell count decreased                                          | 27 (7.3)                                  | 10 (5.3)                                  | 0.4723                                    |
| Lymphocyte count decreased                                                | 20 (5.4)                                  | 9 (4.8)                                   | 0.8420                                    |
| Platelet count decreased                                                  | 11 (3.0)                                  | 3 (1.6)                                   | 0.4021                                    |
| <b>SAEs seen in <math>\geq 2\%</math> of patients</b>                     |                                           |                                           |                                           |
| Overall events                                                            | 141 (38.2)                                | 62 (33.0)                                 | 0.2639                                    |
| Febrile neutropenia                                                       | 43 (11.7)                                 | 12 (6.4)                                  | 0.0515                                    |
| Neutropenia                                                               | 13 (3.5)                                  | 9 (4.8)                                   | 0.4943                                    |

|                                     |           |           |        |
|-------------------------------------|-----------|-----------|--------|
| Pneumonia                           | 25 (6.8)  | 6 (3.2)   | 0.1162 |
| ARRs seen in $\geq 2\%$ of patients |           |           |        |
| Overall events                      | 77 (20.9) | 40 (21.3) | 0.9128 |
| Injection-site reactions*           | 21 (5.7)  | 0 (0)     | 0.0002 |
| Fatigue                             | 7 (1.9)   | 4 (2.1)   | 1      |
| Nausea                              | 8 (2.2)   | 4 (2.1)   | 1      |
| Neutrophil count decreased          | 5 (1.4)   | 8 (4.3)   | 0.0400 |
| Lymphocyte count decreased          | 15 (4.1)  | 4 (2.1)   | 0.3249 |

Data are n (%).

AE: adverse event; ARR: administration-related reaction; CHOP: cyclophosphamide, doxorubicin, vincristine, and prednisone; IV: intravenous; SAE: serious adverse event; SC: subcutaneous.

\*Erythema, pain, bruising, discoloration, hematoma, hypertrophy, induration, inflammation, and swelling.

**Table S2: Analysis of grade ≥3 AEs and SAEs on or after cycle 2 by subgroup.**

| <b>Patients</b>         | <b>Rituximab SC plus CHOP</b> | <b>Rituximab IV plus CHOP</b> |
|-------------------------|-------------------------------|-------------------------------|
| <b>Grade ≥3 AEs</b>     |                               |                               |
| Age <60 years           |                               |                               |
| Low BSA*                | 20/35 (57%)                   | 9/21 (43%)                    |
| Medium BSA <sup>†</sup> | 25/49 (51%)                   | 9/19 (47%)                    |
| High BSA <sup>‡</sup>   | 24/58 (41%)                   | 12/36 (33%)                   |
| Age ≥60 years           |                               |                               |
| Low BSA*                | 50/77 (65%)                   | 16/33 (49%)                   |
| Medium BSA <sup>†</sup> | 40/70 (57%)                   | 25/43 (58%)                   |
| High BSA <sup>‡</sup>   | 36/80 (45%)                   | 22/36 (61%)                   |
| Male                    |                               |                               |
| Low BSA*                | 18/26 (69%)                   | 3/8 (38%)                     |
| Medium BSA <sup>†</sup> | 36/62 (58%)                   | 17/33 (52%)                   |
| High BSA <sup>‡</sup>   | 49/116 (42%)                  | 25/56 (45%)                   |
| Female                  |                               |                               |
| Low BSA*                | 52/86 (61%)                   | 22/46 (48%)                   |
| Medium BSA <sup>†</sup> | 29/57 (51%)                   | 17/29 (59%)                   |
| High BSA <sup>‡</sup>   | 11/22 (50%)                   | 9/16 (56%)                    |
| <b>SAEs</b>             |                               |                               |
| Age <60 years           |                               |                               |
| Low BSA*                | 8/35 (23%)                    | 4/21 (19%)                    |
| Medium BSA <sup>†</sup> | 19/49 (39%)                   | 5/19 (26%)                    |
| High BSA <sup>‡</sup>   | 9/58 (16%)                    | 8/36 (22%)                    |
| Age ≥60 years           |                               |                               |
| Low BSA*                | 35/77 (46%)                   | 10/33 (30%)                   |
| Medium BSA <sup>†</sup> | 32/70 (46%)                   | 16/43 (37%)                   |
| High BSA <sup>‡</sup>   | 23/80 (29%)                   | 15/36 (42%)                   |
| Male                    |                               |                               |
| Low BSA*                | 16/26 (62%)                   | 3/8 (38%)                     |
| Medium BSA <sup>†</sup> | 29/62 (47%)                   | 11/33 (33%)                   |
| High BSA <sup>‡</sup>   | 25/116 (22%)                  | 19/56 (34%)                   |
| Female                  |                               |                               |
| Low BSA*                | 27/86 (31%)                   | 11/46 (24%)                   |

|                         |             |             |
|-------------------------|-------------|-------------|
| Medium BSA <sup>†</sup> | 22/57 (39%) | 10/29 (35%) |
| High BSA <sup>‡</sup>   | 7/22 (32%)  | 4/16 (25%)  |

Data are n (%).

AE: adverse event; BSA: body surface area; CHOP: cyclophosphamide, doxorubicin, vincristine, and prednisone; IV: intravenous; SAE: serious adverse event; SC: subcutaneous.

\*BSA  $\leq 1.7$  m<sup>2</sup>. <sup>†</sup>BSA  $>1.7$ – $\leq 1.9$  m<sup>2</sup>. <sup>‡</sup>BSA  $>1.9$  m<sup>2</sup>.

**Table S3: Mean (SD) RASQ scores at cycles 3 and 7 (ITT RASQ population).**

| <b>Domain</b>                               | <b>Visit</b> | <b>Rituximab SC</b> | <b>Rituximab IV</b> |
|---------------------------------------------|--------------|---------------------|---------------------|
| <b>Physical impact</b>                      | Cycle 3      | 87.11 (12.889)      | 84.46 (15.145)      |
|                                             | Cycle 7      | 86.24 (14.012)      | 81.49 (16.848)      |
| <b>Psychological impact</b>                 | Cycle 3      | 84.23 (14.219)      | 77.25 (17.355)      |
|                                             | Cycle 7      | 85.65 (13.920)      | 78.65 (18.233)      |
| <b>Impact on activities of daily living</b> | Cycle 3      | 82.96 (16.802)      | 60.37 (19.960)      |
|                                             | Cycle 7      | 83.77 (16.117)      | 57.38 (19.230)      |
| <b>Convenience</b>                          | Cycle 3      | 82.31 (13.533)      | 62.38 (19.813)      |
|                                             | Cycle 7      | 82.32 (13.428)      | 60.14 (17.473)      |
| <b>Satisfaction</b>                         | Cycle 3      | 87.59 (12.854)      | 78.28 (16.946)      |
|                                             | Cycle 7      | 89.58 (12.051)      | 77.39 (18.232)      |

ITT: intent-to-treat; IV: intravenous; RASQ: Rituximab Administration Satisfaction Questionnaire; SC: subcutaneous; SD: standard deviation.

**Table S4: Mean (SD) CTSQ scores at cycles 3 and 7 (ITT CTSQ population).**

| <b>Domain</b>                      | <b>Visit</b> | <b>Rituximab SC</b> | <b>Rituximab IV</b> |
|------------------------------------|--------------|---------------------|---------------------|
| <b>Expectations of therapy</b>     | Cycle 3      | 79.74 (17.760)      | 82.13 (18.058)      |
|                                    | Cycle 7      | 79.35 (17.422)      | 82.94 (16.536)      |
| <b>Feelings about side effects</b> | Cycle 3      | 63.38 (18.650)      | 62.73 (21.241)      |
|                                    | Cycle 7      | 60.69 (21.594)      | 57.62 (23.339)      |
| <b>Satisfaction with therapy</b>   | Cycle 3      | 86.02 (11.066)      | 83.25 (12.571)      |
|                                    | Cycle 7      | 85.92 (11.428)      | 83.60 (13.451)      |

CTSQ: Cancer Treatment Satisfaction Questionnaire; ITT: intent-to-treat; IV: intravenous; SC: subcutaneous; SD: standard deviation.

**Figure S1. MabEase Study Design.**

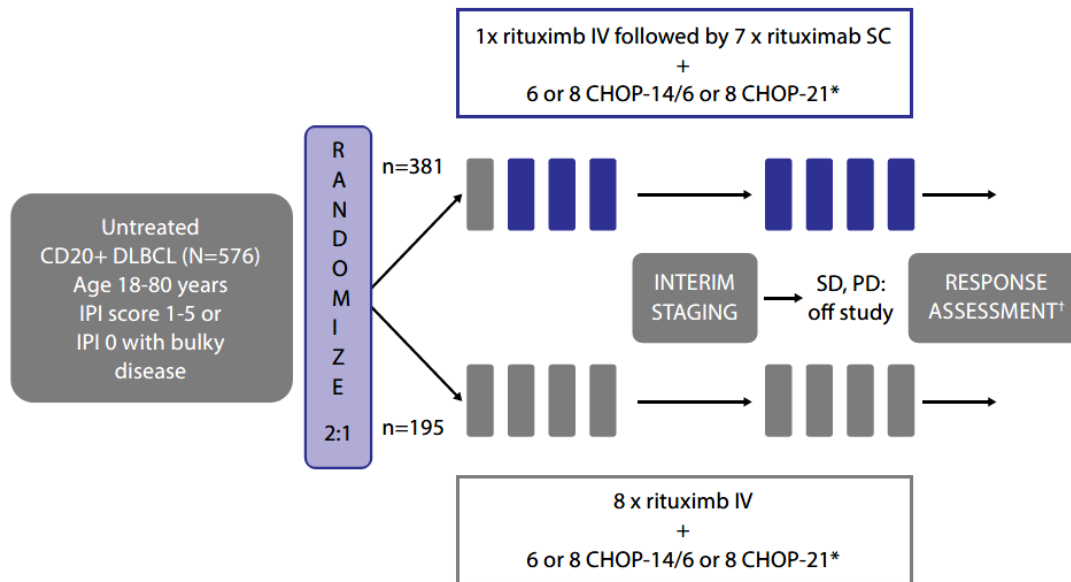

All patients received CHOP chemotherapy (cyclophosphamide 750 mg/m<sup>2</sup> IV, doxorubicin 50 mg/m<sup>2</sup>, vincristine 1.4 mg/m<sup>2</sup>, and prednisone/prednisolone 100 mg) every 14 (CHOP-14) or 21 days (CHOP-21). The CHOP regimen was chosen by the treating physician according to local practice. The length of each treatment cycle and the number of cycles received depended on the chemotherapy backbone. Patients received six cycles of CHOP when a complete response was reached after four cycles, or otherwise eight cycles, as a CHOP-14 or CHOP-21 cycle. No dose reductions were permitted for rituximab SC or IV. Dose modifications to chemotherapy because of toxicity (delay, reduction, or discontinuation) were permitted (as per protocol) and recorded. Of 576 randomized patients, 572 received treatment (rituximab SC n=378; rituximab IV n=194).

CHOP: cyclophosphamide, doxorubicin, vincristine, and prednisone; DLBCL: diffuse large B-cell lymphoma; IPI: International Prognostic Index; PD: progressive disease; SC: subcutaneous; SD: stable disease.

\*Selected by investigators. †Cheson et al, 1999 criteria.



**Figure S2. Subgroup Analysis of Progression-Free Survival.**

**A**

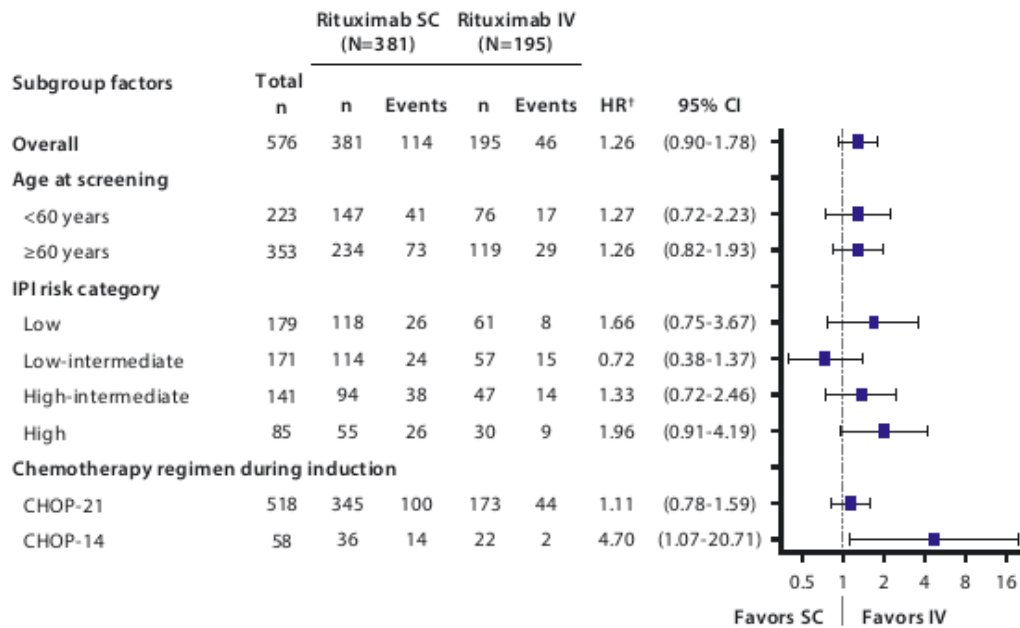

**B**

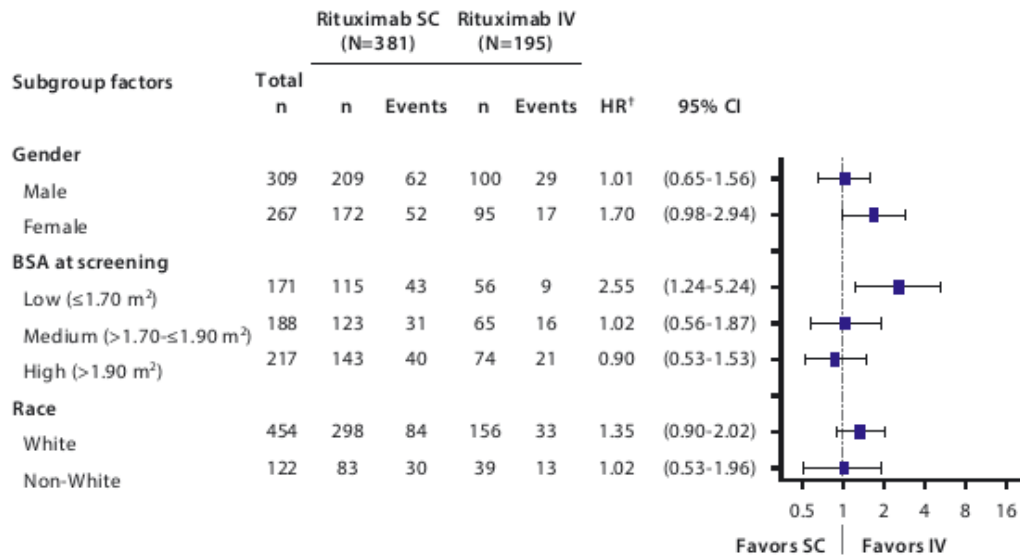

BSA: body surface area; CI: confidence interval; HR: hazard ratio; IPI: International Prognostic Index; IV: intravenous; SC: subcutaneous.

\*All randomized patients. <sup>†</sup>HR from unstratified Cox model.
